# Supplementary material
Source: PubMed Central journal article supplement (PMC5423094)
Supplement: NIHMS834103-supplement-2.pdf [file NIHMS834103-supplement-2.pdf]

**Supplementary Table 1. Comparison of approaches to discover RNA regulatory elements.**

| <b>Strategy</b>                          | <b>Implementation</b>                                                                          | <b>Advantages</b>                                                                                                        | <b>Disadvantages</b>                                                                                                                         | <b>References</b>                                              |
|------------------------------------------|------------------------------------------------------------------------------------------------|--------------------------------------------------------------------------------------------------------------------------|----------------------------------------------------------------------------------------------------------------------------------------------|----------------------------------------------------------------|
| Full-length biological sequences         | PCR or endogenous half-life measurements                                                       | Potential to capture regulatory RNA activity which require long-range interactions                                       | Limited insight on the minimal regulatory element; multiple regulatory elements may be present per sequence whose effects can't be separated | Geisberg, 2014, Wolter, 2015 (3'LIFE)                          |
| Random oligonucleotide sequences         | Custom synthesis                                                                               | Unbiased sampling of potential regulatory sequences                                                                      | Number of possible sequences grows exponentially for longer oligos, making it difficult/inefficient to assay longer regulatory elements      | Rosenberg, 2015, Wissink, 2016                                 |
| Targeted short biological sequences      | Custom synthesis                                                                               | Measuring activity of biological sequence fragments                                                                      | Labor intensive curation, biased selection of sequences to assay (e.g., using sequence conservation level)                                   | Oikonomou, 2014, Zhao 2014 (fast-UTR), Weingarten-Gabbay, 2016 |
| Randomly fragmented biological sequences | PCR followed by sonication, or pre-built high-throughput sequencing libraries can also be used | Coverage by many partially overlapping random fragments yields high nucleotide resolution of regulatory element position | High nucleotide resolution depends on sufficient depth of sequencing (100X)                                                                  | <b>Current study (RESA)</b>                                    |

**Supplementary Table 2. Summary of sequencing results.**

| Condition     | Replicate | Experiment     | Total read pairs | Aligned read pairs |                  |                  |
|---------------|-----------|----------------|------------------|--------------------|------------------|------------------|
|               |           |                |                  | WT                 | C to T converted | G to A converted |
| Library Input | 1         | RESA           | 3530868          | 2928926            | NA               | NA               |
| Early         | 1         | RESA           | 3494047          | 2946878            | NA               | NA               |
| Early         | 2         | RESA           | 4766081          | 4020944            | NA               | NA               |
| Late          | 1         | RESA           | 5895953          | 4975343            | NA               | NA               |
| Late          | 2         | RESA           | 8845108          | 7477684            | NA               | NA               |
| Late          | 3         | RESA           | 3958477          | 3346324            | NA               | NA               |
| 430LNA        | 1         | RESA           | 9489219          | 8013334            | NA               | NA               |
| 430LNA        | 2         | RESA           | 8640935          | 7325241            | NA               | NA               |
| 430LNA        | 3         | RESA           | 11840412         | 10020842           | NA               | NA               |
| Early         | 1         | RESA-Bisulfite | 13487785         | 36351              | 2295038          | 7906741          |
| Early         | 2         | RESA-Bisulfite | 11984468         | 31996              | 2195578          | 6866070          |
| Early         | 3         | RESA-Bisulfite | 14991744         | 42034              | 2733234          | 8616533          |
| Late          | 1         | RESA-Bisulfite | 4166676          | 11298              | 724906           | 2426895          |
| Late          | 2         | RESA-Bisulfite | 7302088          | 19730              | 1243021          | 4278012          |
| Late          | 3         | RESA-Bisulfite | 7412900          | 19946              | 1250178          | 4355579          |
| Ago2          | 1         | RESA-CLIP      | 61467344         | 47754369           | NA               | NA               |
| CLIP Input    | 1         | CLIP-Input     | 64900157         | 52860980           | NA               | NA               |

Each entry lists an independent biological sample. Total read pairs are reported, where each pair equals two sequencing reads (read 1 and read 2). Alignment count is with respect to concordantly aligned read pairs. For bisulfite-converted reads, alignment totals are reported separately for the two different converted genomes.

**Supplementary Table 3. Summary of miR-430 target sequences across the UTR library.**

|               | Within RESA destabilized region |                       |                       | Poly-morphic seed | Low Seq coverage | No destabilization detected |
|---------------|---------------------------------|-----------------------|-----------------------|-------------------|------------------|-----------------------------|
|               | miR-430 dependent               | Non miR-430 dependent | Low confidence region |                   |                  |                             |
| 8-mers        | 13                              | 0                     | 1                     | 0                 | 0                | 0 (0%)                      |
| 7-mers        | 38                              | 2                     | 1                     | 0                 | 2                | 1 (2%)                      |
| 6-mers        | 93                              | 9                     | 22                    | 2                 | 8                | 25 (16%)                    |
| Offset 6-mers | 40                              | 5                     | 25                    | 7                 | 15               | 49 (35%)                    |

miR-430 target seed sequences (8-mer, 7-mer, 6-mer and offset 6-mer matches) are enumerated across the 3'UTRs using the Zv9 reference genome sequence. For each category, a seed may fall within a RESA destabilized region (assigned to the miR-430 dependent, non miR-430 dependent, or low-confidence destabilized categories). Otherwise, a seed sequence may have nucleotide polymorphisms compared to the reference genome (affecting target complementarity) or low sequencing read coverage (<100X at early stage).
